# Supplementary material for: The Mechanism of the Photostability Enhancement of Thin-Film Transistors Based on Solution-Processed Oxide Semiconductors Doped with Tetravalent Lanthanides
Source: MDPI journal article supplement (doi:10.3390/nano12213902), 2022-11-04
Supplement: s1 [file s1]

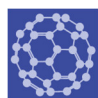

## Supplementary Information

# The Mechanism of the Photostability Enhancement of Thin-Film Transistors Based on Solution-Processed Oxide Semiconductors Doped with Tetravalent Lanthanides

Linfeng Lan <sup>1,\*</sup>, Chunchun Ding <sup>1</sup>, Penghui He <sup>2</sup>, Huimin Su <sup>1</sup>, Bo Huang <sup>1</sup>, Jintao Xu <sup>1</sup>, Shuguang Zhang <sup>1</sup> and Junbiao Peng <sup>1</sup>

<sup>1</sup> State Key Laboratory of Luminescent Materials and Devices, South China University of Technology, Guangzhou 510640, China

<sup>2</sup> School of Physics and Electronics, Hunan University, Changsha 410082, China

\* Correspondence: lanlinfeng@scut.edu.cn;

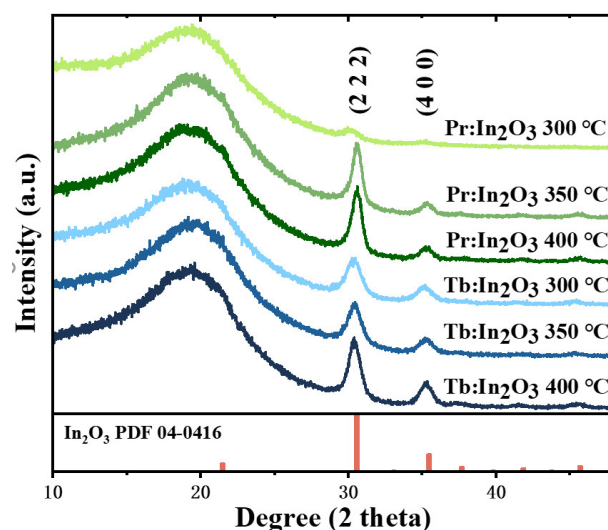

**Figure S1.** XRD patterns of the Pr/Tb:In<sub>2</sub>O<sub>3</sub> films annealed at different temperatures, and the bottom pattern is the standard refraction pattern of the single-crystal bixbyite In<sub>2</sub>O<sub>3</sub>.

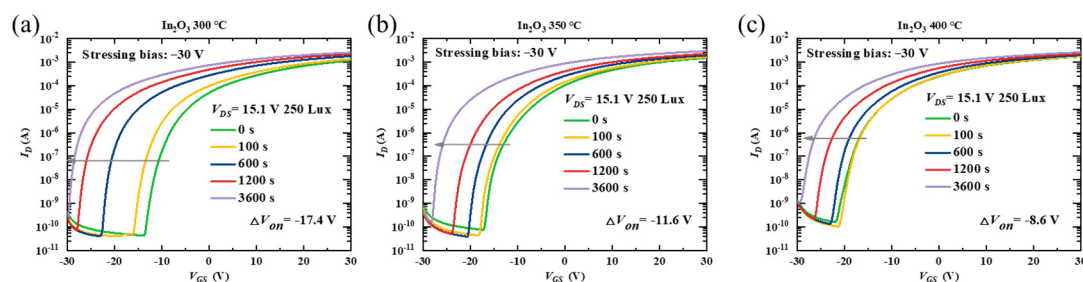

**Figure S2.** The variations of time-dependent transfer curves under NBIS (a negative gate bias stress of  $-30$  V combining with white LED light illumination of 250 Lux) for the TFTs with channels of In<sub>2</sub>O<sub>3</sub> annealed at (a) 300, (b) 350, and (c) 400 °C.

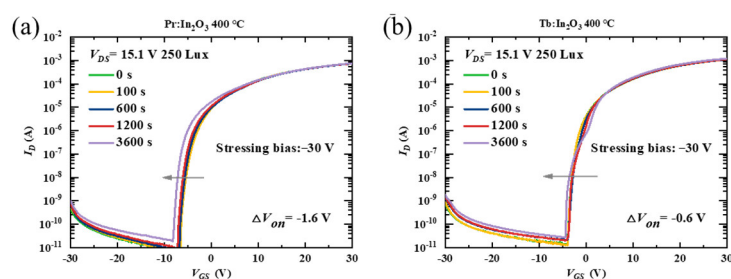

**Figure S3.** The variations of time-dependent transfer curves under NBIS (a negative gate bias stress of -30 V combining with white LED light illumination of 250 Lux) for the TFTs with channels of (a) Pr:In<sub>2</sub>O<sub>3</sub> and (b) Tb:In<sub>2</sub>O<sub>3</sub> annealed at 400 °C.

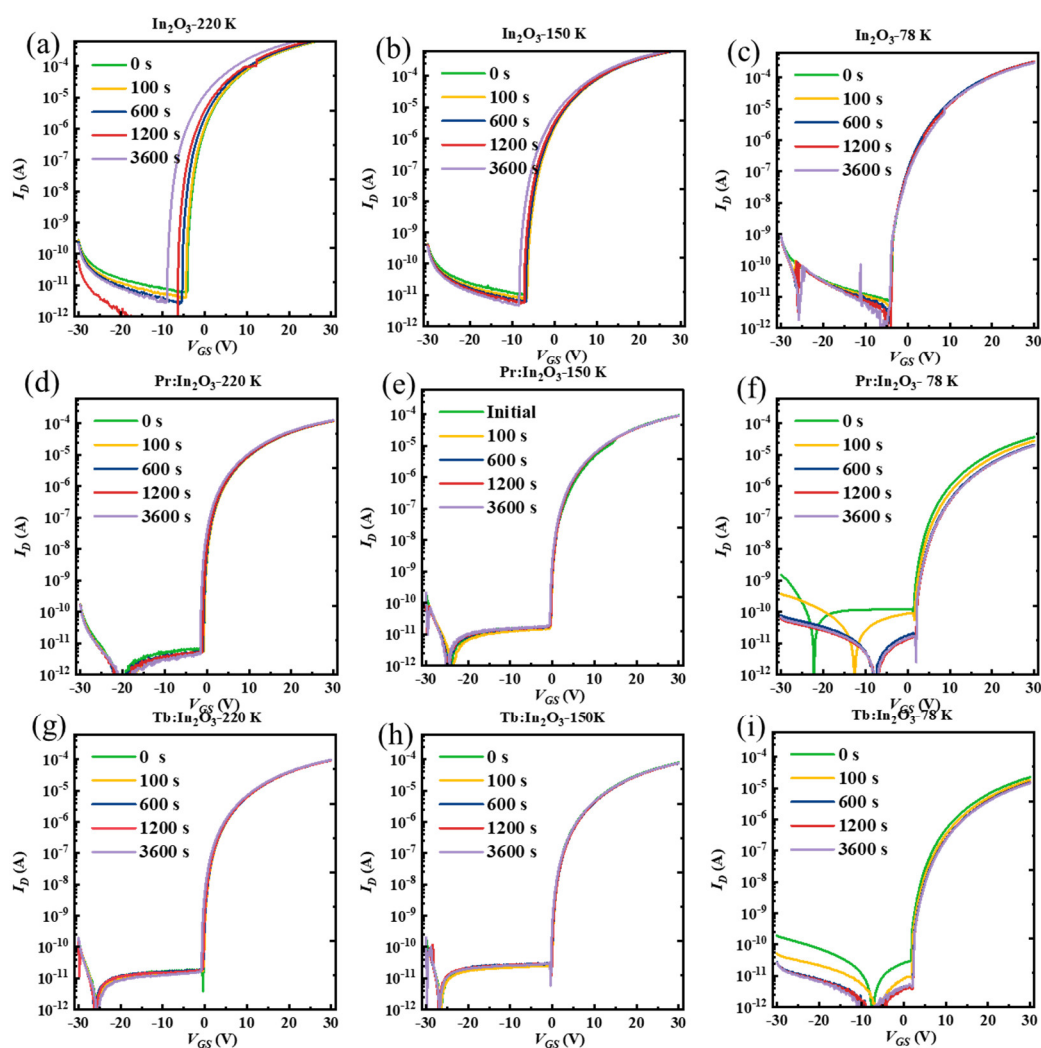

**Figure S4.** Variations of time-dependent transfer curves under NBIS with different temperatures of 78 K, 150 K, and 220 K (a negative gate bias stress of -20 V combining with white LED light illumination of 250 Lux) for the TFTs with channels of In<sub>2</sub>O<sub>3</sub> (measured under (a) 78 K, (b) 150 K, (c) 220 K), Pr:In<sub>2</sub>O<sub>3</sub> (measured under (d) 78 K, (e) 150 K, (f) 220 K), and Tb:In<sub>2</sub>O<sub>3</sub> (measured under (g) 78 K, (h) 150 K, (i) 220 K).

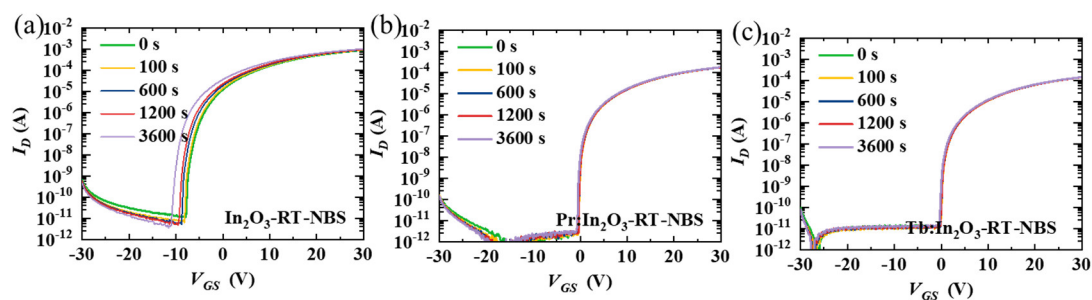

**Figure S5.** Variations of time-dependent transfer curves under NBS without light illumination at room temperature for the TFTs with channels of (a)  $\text{In}_2\text{O}_3$ , (b)  $\text{Pr}:\text{In}_2\text{O}_3$ , and (c)  $\text{Tb}:\text{In}_2\text{O}_3$ .

**Table S1.** Summary of the parameters of the fitting peaks of the XPS Pr  $3d$  spectra in Figure 7.

| Temperature<br>(°C) | Pr $3d_{5/2}$ Binding Energy<br>(eV) |       |       |       | Pr Composition<br>(%) |                  |
|---------------------|--------------------------------------|-------|-------|-------|-----------------------|------------------|
|                     | 928                                  | 931   | 933   | 935   | Pr <sup>3+</sup>      | Pr <sup>4+</sup> |
| 300                 | 17.38                                | 19.69 | 36.79 | 26.14 | 54.17                 | 45.83            |
| 350                 | 16.68                                | 20.69 | 35.15 | 25.48 | 51.83                 | 48.17            |
| 400                 | 17.83                                | 20.69 | 34.17 | 27.31 | 52.00                 | 48.00            |

**Table S2.** Summary of the parameters of the fitting peaks of the XPS Tb  $3d$  spectra in Figure 7.

| Temperature<br>(°C) | Tb $3d_{5/2}$ Binding Energy<br>(eV) |       |        | Tb Composition<br>(%) |                  |
|---------------------|--------------------------------------|-------|--------|-----------------------|------------------|
|                     | 1239.8                               | 1243  | 1249.8 | Tb <sup>3+</sup>      | Tb <sup>4+</sup> |
| 300                 | 22.87                                | 23.00 | 3.07   | 53.00                 | 47.00            |
| 350                 | 21.99                                | 23.79 | 3.41   | 51.64                 | 48.36            |
| 400                 | 23.76                                | 27.81 | 3.86   | 49.83                 | 50.17            |
